# Supplementary material for: Tandem fecal microbiota transplantation cycles in an allogeneic hematopoietic stem cell transplant recipient targeting carbapenem-resistant Enterobacteriaceae colonization: a case report and literature review
Source: Springer Nature journal article supplement (doi:10.1186/s40001-021-00508-8), 2021-04-28
Supplement: MOESM1 [file 19114578]

# Klebsiella pneumoniae

|                        |            |   |       |
|------------------------|------------|---|-------|
| Amoxicillin/Clavulanic | $\geq 32$  | R | ug/ml |
| Ceftriaxone            | $\geq 64$  | R | ug/ml |
| Imipenem               | $\geq 16$  | R | ug/ml |
| Cefuroxime sodium      | $\geq 64$  | R | ug/ml |
| Cotrimoxazole          | $\geq 320$ | R | ug/ml |
| Cefepime               | $\geq 32$  | R | ug/ml |
| Cefoperazone/Sulbactam | $\geq 64$  | R | ug/ml |
| Amikacin               | $\geq 64$  | R | ug/ml |

|                         |            |   |       |
|-------------------------|------------|---|-------|
| Ertapenem               | $\geq 8$   | R | ug/ml |
| Cefoxitin               | $\geq 64$  | R | ug/ml |
| Levofloxacin            | $\geq 8$   | R | ug/ml |
| Cefuroxime              | $\geq 64$  | R | ug/ml |
| Ceftazidime             | $\geq 64$  | R | ug/ml |
| Piperacillin/Tazobactam | $\geq 128$ | R | ug/ml |
| Tigecycline             | 2          | S | ug/ml |
